# Supplementary material
Source: publisher site journal article supplement (https://www.jstage.jst.go.jp/article/geochemj/46/5/46_1.0172/_supplement/_download/46_1.0172_1.pdf)

Appendix

di-methyl phthalate (DMP)

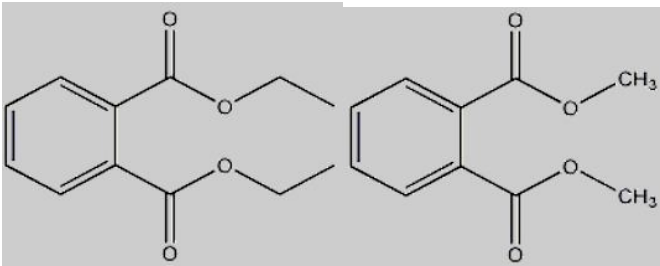

di-ethyl phthalate (DEP)



di-n-butyl phthalate (DnBP)

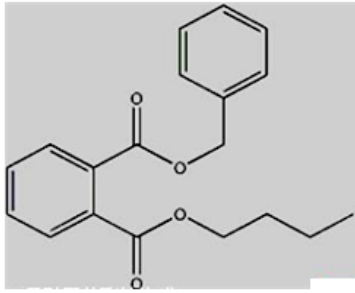

butylbenzyl phthalate (BBP)

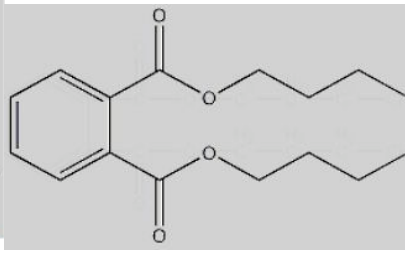

di (2-ethylhexyl) phthalate (DEHP)

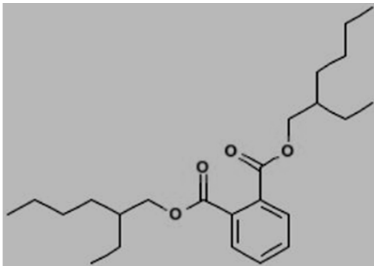

di-n-octyl phthalate (DnOP)

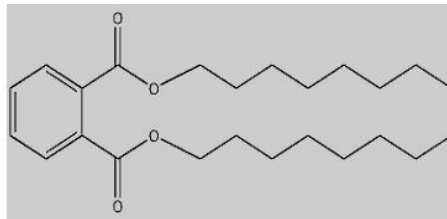

Supplement: Supplementary file 1 [file 46_1.0172_1.pdf]
